# **Repeats Of Unusual Size in Plant Mitochondrial Genomes: Identification, Incidence and Evolution**

Emily L. Wynn<sup>1</sup> and Alan C. Christensen<sup>2</sup>

School of Biological Sciences

University of Nebraska

Lincoln, Nebraska 68588-0666, USA

<sup>1</sup> ORCID 0000-0001-6902-9301

<sup>2</sup> ORCID 0000-0002-1125-3172

1 **Running title: Repeats in plant mitochondria**

2

3 **Key words: Plant mitochondrial genomes, Repeated sequence, Genome**

4 **rearrangement, Organelle genome evolution**

5

Author for Correspondence: Alan C. Christensen, School of Biological Sciences,  
University of Nebraska – Lincoln, Lincoln, NE, USA, 68588-0666, Phone 402-472-  
0681, FAX 402-472-8722, email [achristensen2@unl.edu](mailto:achristensen2@unl.edu)

## 1 **Abstract**

2 Plant mitochondrial genomes have excessive size relative to coding capacity, a low  
3 mutation rate in genes and a high rearrangement rate. They also have non-tandem  
4 repeats in two size groups: a few large repeats which cause isomerization of the  
5 genome by recombination, and numerous repeats longer than 50bp, often found in  
6 exactly two copies per genome. It appears that repeats in the size range from several  
7 hundred to a few thousand base pair are underrepresented. The repeats are not  
8 well-conserved between species, and are infrequently annotated in mitochondrial  
9 sequence assemblies. Because they are much larger than expected by chance we call  
10 them Repeats Of Unusual Size (ROUS). The repeats consist of two functional classes,  
11 those that are involved in genome isomerization through frequent crossing over,  
12 and those for which crossovers are rare unless there are mutations in DNA repair  
13 genes, or the rate of double-strand breakage is increased. We systematically  
14 described and compared these repeats, which are important clues to mechanisms of  
15 DNA maintenance in mitochondria. We developed a tool to find non-tandem repeats  
16 and analyzed the complete mitochondrial sequences from 135 plant species. We  
17 observed an interesting difference between taxa: the repeats are larger and more  
18 frequent in the vascular plants. Analysis of closely related species also shows that  
19 plant mitochondrial genomes evolve in dramatic bursts of breakage and rejoining,  
20 complete with DNA sequence gain and loss, and the repeats are included in these  
21 events. We suggest an adaptive explanation for the existence of the repeats and their  
22 evolution.

## 1 **Introduction**

2 It has long been known that plant mitochondrial genomes are much larger than  
3 those of animals (Ward, B. L. *et al.* 1981) and include significant amounts of non-  
4 coding DNA (Schuster, W. and A. Brennicke 1994). These genomes also often have  
5 repeats of several kb, leading to multiple isomeric forms of the genome (Folkerts, O.  
6 and M. R. Hanson 1989; Klein, M. *et al.* 1994; Palmer, J. D. and L. A. Herbon 1988;  
7 Palmer, J. D. and C. R. Shields 1984; Siculella, L. *et al.* 2001; Sloan, D. B. *et al.* 2010;  
8 Stern, D. B. and J. D. Palmer 1986). Plant mitochondrial genomes have very low  
9 mutation rates, but paradoxically have such high rearrangement rates that there is  
10 virtually no conservation of synteny (Drouin, G. *et al.* 2008; Palmer, J. D. and L. A.  
11 Herbon 1988; Richardson, A. O. *et al.* 2013; Wolfe, K. *et al.* 1987).

12

13 In addition to the large, frequently recombining repeats, there are often other  
14 repeated sequences in the size range of 1kb and lower (Arrieta-Montiel, M. P. *et al.*  
15 2009; Forner, J. *et al.* 2005). Ectopic recombination between these homeologous  
16 repeats has been shown to increase when double-strand breakage is increased, or in  
17 plants mutant for DNA maintenance genes (Abdelnoor, R. V. *et al.* 2003; Shedge, V. *et*  
18 *al.* 2007; Wallet, C. *et al.* 2015). Understanding the repeats is critical to fully  
19 understanding the mechanisms of DNA maintenance and evolution in plant  
20 mitochondria, yet they have never been systematically identified and analyzed. In  
21 addition to being infrequently and inconsistently annotated and described in  
22 mitochondrial genome sequences, repeats are often described as long, short and  
23 intermediate-length (Arrieta-Montiel, M. P. *et al.* 2009; Davila, J. I. *et al.* 2011; Miller-

1 Messmer, M. *et al.* 2012). The repeats are sometimes thought to be distributed into  
2 two size classes (one of up to several hundred bp and another of several kb), but  
3 this is derived from early studies of Arabidopsis and a few other species in which  
4 repeats were described and annotated.

5

6 The most likely hypothesis that explains the peculiar characteristics of plant  
7 mitochondrial genomes is that double-strand break repair (DSBR) is abundantly  
8 used in plant mitochondria, perhaps to the exclusion of nucleotide excision and  
9 mismatch repair pathways (Christensen, A. C. 2014; Christensen, A. C. 2018).

10 Double-strand break repair is very accurate when the repair is template-based,  
11 accounting for the low mutation rate in genes, but the nonhomologous end-joining  
12 or break-induced-replication pathways can account for the creation of repeats and  
13 chimeric genes, expansions, and loss of synteny through rearrangements.

14

15 The lack of a coherent nomenclature and the inconsistent reporting and annotation  
16 of repeated sequences leads to a number of questions. What is the best way to  
17 discover and characterize them? Is the size distribution really bimodal in  
18 angiosperms? Are there repeats in the mitochondria of other groups of green  
19 plants? How do they differ between groups? And can they be followed through  
20 evolutionary lineages like genes? Are the repeats themselves somehow adaptive, or  
21 are they a side-effect of DSBR that is neutral or nearly neutral? The availability in  
22 recent years of complete mitochondrial genome sequences across a wide variety of  
23 taxa of green plants allows us to begin addressing these questions. We describe a

1 computational strategy for finding non-tandem repeats within genomes. Using this  
2 tool we describe the phylogenetic distribution of repeats in both size classes,  
3 examine their evolution in a family of closely related angiosperms, and propose an  
4 hypothesis for the evolutionary significance of the repeats and the DSBR processes  
5 that produce them.

6

## 7 **Materials and Methods**

### 8 **Sequence data and manipulation**

9 DNA sequences were downloaded as FASTA format files from GenBank  
10 (<https://www.ncbi.nlm.nih.gov/genbank/>). BLAST searches (Altschul, S. F. *et al.*  
11 1990) were done using version 2.7.1 on a Linux-based machine. In addition to the  
12 sequences shown in Table 1, mitochondrial genomes from several Brassica species  
13 were used to compare close relatives. These sequences are as follows: *Brassica*  
14 *carinata*; JF920287, *Brassica rapa*; JF920285, *Brassica oleracea fujiiwase*; AP012988,  
15 *Brassica napus polima*; FR715249, *Brassica juncea*; JF920288. Alignments were done  
16 using the clustalW implementation in the VectorNTI 11.5 software package  
17 (ThermoFisher).

18

### 19 **Repeat Analysis**

20 Custom Python scripts are in Supplementary Materials. The script ROUSFinder.py  
21 (Supplemental File S1) uses blastn to perform a pairwise ungapped comparison of a  
22 sequence with itself, both strands separately, using a word size of 50, E value of  
23 10,000, reward for a match +1, penalty for a mismatch -9, percent identity cutoff

1 99%. The script then concatenates the two output files and the full length identity is  
2 deleted. Alignments are then sorted and compared to identify and remove duplicate  
3 repeats, and an output file of the repeats in fasta format is created. This output file is  
4 then used as a query with the genome as subject to locate every copy of that repeat,  
5 create a table, and a table of binned sizes. The output can also be formatted for  
6 GenBank annotation. MultipleRepeats.py (Supplemental File S2) automates running  
7 ROUSFinder.py on every sequence within a directory.

8

## 9 **Data Availability**

10 The authors state that all data necessary for confirming the conclusions presented  
11 in this article are represented fully within the article, including python scripts in  
12 Supplemental Material and accession numbers of DNA sequences shown in Table 1.  
13 Supplemental Material available at FigShare.

14

## 15 **Results**

### 16 **Repeats in plant mitochondrial genomes**

17 The existence of large non-tandem repeats in plant mitochondrial genomes is well  
18 known by now, but they have not been systematically identified and analyzed. Prior  
19 studies used variations of BLAST (Altschul, S. F. *et al.* 1990) to find repeats  
20 (Alverson, A. J. *et al.* 2011a; Alverson, A. J. *et al.* 2010; Alverson, A. J. *et al.* 2011b; Liu,  
21 Y. *et al.* 2014) or REPuter (Hecht, J. *et al.* 2011; Kurtz, S. and C. Schleiermacher  
22 1999). Other available software packages specifically identify tandem repeats, or  
23 repeats matching known repetitive sequences. Due to the ready availability of

1 BLAST and the flexibility of its use, and because most prior work used it, we wrote  
2 and used a Python script called ROUSFinder.py that uses BLAST to identify non-  
3 tandem repeats within mitochondrial genomes. The parameters for identification of  
4 a sequence repeat were relatively stringent and included a blastn word size of 50, a  
5 percent identify cutoff of 99% and match/mismatch scores of +1/-9. Any choice of  
6 parameters will necessarily identify some false positives and false negatives. These  
7 parameters were chosen in order to find duplicate copies of sequence that were  
8 either recently created or recently corrected by gene conversion. A duplication  
9 longer than 100 bases that has several mismatches in the center of the repeat unit  
10 will be identified as two different repeats in this way. However, the mismatches in  
11 the center are indicative of either two independent events producing the two parts  
12 of the repeat, or mutation and drift that have escaped gene conversion. Because we  
13 are concerned with the recombination behavior of the repeats we therefore choose  
14 to call these two different repeats. To analyze and identify repeats in a single  
15 sequence for further study or annotation would require additional manual curation  
16 of the output.

17 The species we used represent a significant subset of the complete mitochondrial  
18 genome sequences from green plants in GenBank and are shown in Table 1.  
19 Sequences available on GenBank are not a random sample across taxa (food crops  
20 are very over-represented, for example), so to reduce sampling bias somewhat we  
21 used only one species per genus. Incomplete sequences or sequences with gaps are  
22 not handled well by BLAST without further curation, so these were not used. Species  
23 with multiple distinct chromosomes were also not used because of the additional



1 layer of complexity from inter- and intra-chromosomal repeats. The full output is in  
2 Supplemental Table S1. The repeats seen in plant mitochondrial genomes are much  
3 larger than those found in random sequence (data not shown), suggesting that they  
4 arise from specific biological processes and are not stochastic. For this reason we  
5 call them “Repeats Of Unusual Size” or ROUS (Christensen, A. C. 2018).

6

7 BLAST is an excellent tool for identification of repeated sequences. Our script  
8 automates the task of identifying repeats in both direct and inverted orientations,  
9 removes the full-length match, and provides the output in a convenient format that  
10 can be used for annotation or in spreadsheets for further analysis.

11

## 12 **Phylogenetic clustering**

13 The distribution of repeat sizes forms distinct clusters between the phylogenetic  
14 groups (see Figure 1). Because there are different numbers of species in each group,  
15 and some species have an order of magnitude more total repeats than others, we  
16 represent the data as the fraction of species within that group that have at least one  
17 repeat within a given size range. The complete output is in Supplemental Table S1.

18 There are several complete mitochondrial genomes from chlorophytes and  
19 bryophytes to compare to angiosperms. Within the chlorophytes, repeats of greater  
20 than 200bp are rare. The exceptions are the prasinophytes (discussed below) and a  
21 few interesting cases. *Chlamydomonas reinhardtii* has a 532 bp inverted repeat at  
22 the termini of its linear chromosome. *Dunaliella salina*, *Kirchneriella aperta* and  
23 *Polytoma uvella* have novel structures at a small number of loci that consist of

1 overlapping and nested repeats and palindromes (Smith, D. R. *et al.* 2010). The  
2 function of these structures is unknown, but they are unusual and not common in  
3 the chlorophytes. The prasinophyte group resembles the rest of the chlorophytes in  
4 having no ROUS greater than 200bp but many of them include two copies of a single  
5 large repeat between 9.5 and 14.4 kb. This is similar to many chloroplast genomes  
6 and it is possible that this structure is involved in replication (Bendich, A. J. 2004).  
7 The bryophytes generally resemble the chlorophytes; there are no ROUS greater  
8 than 200bp.

9

10 In contrast to the chlorophytes and bryophytes, the Marchantiophyta (liverworts)  
11 and Anthocerotophyta (hornworts) have ROUS greater than 200bp in size, but none  
12 bigger than 867bp. Few taxa within the liverworts and hornworts have been  
13 sequenced, so this group is underrepresented, but the members available to date are  
14 consistent. The other lineages of streptophytic green algae (referred to as  
15 charophytes in GenBank) resemble the chlorophytes albeit with a slightly higher  
16 upper limit. In this group the largest repeat is found in *Chlorokybus atmophyticus*  
17 and is 291bp.

18

19 The ferns and lycophytes are strikingly different from the previous groups.  
20 Unfortunately the number of species sequenced is low. They have large numbers of  
21 repeats and the repeat sizes range well above 200bp, up to 10 kb. Some members of  
22 these groups, such as *Huperzia*, are similar to the bryophytes, but others are large  
23 and have significant repeat content (Guo, W. *et al.* 2017). These groups are also very

1 underrepresented among available mitochondrial sequences (in part due to the  
2 complexity caused by the repetitive nature of the genomes (Grewe, F. *et al.* 2009)),  
3 but the patterns are noticeably different from the nonvascular plants described  
4 above.

5  
6 The angiosperms are represented very well in the sequence databases. Only one  
7 member of this group does not have any ROUS above 200bp (*Medicago truncatula*).  
8 A small number of angiosperms, scattered among plant families, lack repeats larger  
9 than 1 kbp, and approximately half include repeats larger than 9 kbp. *Silene conica*, a  
10 species with multiple large chromosomes not included in our dataset has a nearly  
11 75kb sequence found in both chromosomes 11 and 12 (Sloan, D. B. *et al.* 2012).  
12 Gymnosperms are also underrepresented, but appear to be similar to the other  
13 vascular plants. Interestingly, the gymnosperms *Ginkgo biloba* and *Welwitschia*  
14 *mirabilis* resemble angiosperms, while *Cycas taitungensis* is more similar to ferns.  
15 The *C. taitungensis* mitochondrion has numerous ROUS, including many that are  
16 tandemly repeated. Five percent of this genome consists of the mobile Bpu element,  
17 a remarkable level of repetitiveness (Chaw, S. M. *et al.* 2008).

18  
19 It is only in the vascular plants that the number and size of repeated sequences in  
20 mitochondrial genomes has been expanded. The vascular plants generally only have  
21 genomes a few times larger than the bryophytes, liverworts and hornworts, but the  
22 repeats are expanded well beyond proportionality to size. In addition, random  
23 sequences of comparable length do not have any repeats of the sizes discussed here

1 (data not shown). Some taxa, such as the Geraniaceae, *Plantago*, and *Silene* include  
2 species with significantly expanded genomes (Park, S. *et al.* 2015; Parkinson, C. L. *et*  
3 *al.* 2005; Sloan, D. B. *et al.* 2012). These species are outliers in the magnitude of the  
4 genome sizes and number of repeats, but the underlying processes are likely to be  
5 the same. The overall picture is that there was a significant change in mitochondrial  
6 DNA maintenance mechanisms roughly coincident with the origin of the vascular  
7 plants.

8

### 9 **Repeat sizes and frequency in angiosperms.**

10 Large repeats of several kilobases have been identified in several species and shown  
11 to be recombinationally active, isomerizing angiosperm mitochondrial genomes  
12 (Folkerts, O. and M. R. Hanson 1989; Klein, M. *et al.* 1994; Palmer, J. D. and L. A.  
13 Herbon 1988; Palmer, J. D. and C. R. Shields 1984; Siculella, L. *et al.* 2001; Sloan, D. B.  
14 2013; Stern, D. B. and J. D. Palmer 1986). A few species have been reported to lack  
15 such structures (Palmer, J. D. 1988). The first comprehensive catalog of repeated  
16 sequences shorter than 1000 base pairs was done in *Arabidopsis thaliana*, and they  
17 were shown to be recombinationally active in some mutant backgrounds, but not  
18 generally in wild type (Arrieta-Montiel, M. P. *et al.* 2009; Davila, J. I. *et al.* 2011;  
19 Miller-Messmer, M. *et al.* 2012; Shedge, V. *et al.* 2007). Is the spectrum of repeat  
20 sizes in *Arabidopsis*, and its bimodality, typical for angiosperms? Figure 2 illustrates  
21 the presence of repeats in the size range of 50bp to over 10,000 bp in 58  
22 angiosperms. The overall pattern is that there is a multimodal distribution of sizes  
23 that is often bimodal. Gaps in the distribution are indicated in yellow in Figure 2,

1 however, the size cutoffs of the gap are somewhat variable. Most species have a  
2 paucity of repeats between 600 and 10,000bp. Twelve of the 58 species have no  
3 repeats larger than 600bp, leaving open the question of if they isomerize through  
4 recombination or not. All of the other species have a large repeat of somewhere  
5 between 800bp and 65kbp. The total length of repeats in a species does not  
6 correlate with genome size (linear regression  $r^2 = 0.08$ , data not shown), additional  
7 evidence that these are not produced by stochastic processes, and suggesting that  
8 they occur and change faster than speciation does.

9

## 10 **Alignment of repeats within the Brassicales**

11 Understanding the evolution of the repeated sequences requires analysis of  
12 homologous repeats in related species. Of the species with sequenced mitochondrial  
13 genomes, the Brassicales order of plants has a number of such species. Within the  
14 *Brassica* genus there are three diploid species: *Brassica rapa*, *Brassica nigra* and  
15 *Brassica oleracea*, and three allotetraploid species (Cheng, F. *et al.* 2017). The diploid  
16 nuclear genomes are called the A, B and C genomes, respectively. Based on both  
17 nuclear and mitochondrial sequences it appears that *Brassica carinata* has the *B.*  
18 *nigra* and *B. oleracea* nuclear genomes (BBCC) and the *B. nigra* mitochondrial  
19 genome, while *Brassica juncea* has the *B. nigra* and *B. rapa* nuclear genomes (BBCC)  
20 and the *B. rapa* mitochondrial genome. *Brassica napus* is of two subspecies, *polima*  
21 and *napus*. Both have the *B. oleracea* and *B. rapa* nuclear genomes (AACC), but *B.*  
22 *napus polima* appears to have the *B. rapa* mitochondrial genome and *B. napus napus*  
23 has the *B. oleracea* mitochondrial genome (Chang, S. *et al.* 2011; Franzke, A. *et al.*

1 2011; Grewe, F. *et al.* 2014). Thus it appears that the hybridization event between *B.*  
2 *oleracea* and *B. rapa* occurred at least twice, with each species being the maternal  
3 parent. In the analysis below we use the *B. napus polima* mitochondrial genome. We  
4 compared these Brassica species to *Raphanus sativus* and *Sinapis arvensis*. These  
5 species are the closest relatives of the Brassicas with complete mitochondrial  
6 genome sequences (Grewe, F. *et al.* 2014). Several of these species were mapped  
7 prior to genomic sequencing, and repeated sequences and isomerization of the  
8 genomes was observed (Palmer, J. D. 1988; Palmer, J. D. and L. A. Herbon 1986).

9  
10 All eight of these species include one pair of long repeats, ranging in length from 1.9  
11 to 9.7kb. However, these species fall into two groups. Each group has a large repeat  
12 that is found as a single copy in the other group. The *B. nigra* group consists of *R.*  
13 *sativus*, *S. arvensis*, *B. nigra* and *B. carinata*; the *B. rapa* group consists of *B. rapa*, *B.*  
14 *oleracea*, *B. napus* and *B. juncea*. A tree showing the relationships of these species,  
15 but without measures of distance, is shown in Figure 3. Part A shows the long repeat  
16 and neighboring sequences from the *B. nigra* group and the homologous single-copy  
17 sequences from the *B. rapa* group. Part B compares the long repeat from the *B. rapa*  
18 group to the unique homologous region from the *B. nigra* group.

19  
20 The number of changes in coding DNA between plant species is generally low,  
21 making mutation rate estimates difficult, and these low rates may also be affected by  
22 sequencing errors (Sloan, D. B. *et al.* 2018). Grewe *et al.* examined the synonymous  
23 substitution rates in genes of Brassicales mitochondrial genomes (Grewe, F. *et al.*

1 2014) and found them to be very low, consistent with most land plants. However,  
2 the presence of repeats allows mutations in non-coding DNA to be examined  
3 qualitatively. The long repeats of *R. sativus*, *S. arvensis*, *B. nigra* and *B. carinata* differ  
4 by large block substitutions and insertion/deletions (alignments are shown in  
5 Supplemental Figure S1). Where two copies are present in a species there are very  
6 few difference between copies, and they are generally near the boundaries of the  
7 repeats. Although significant differences can arise during speciation events, both  
8 copies of a repeat within a species remain identical. This supports the hypothesis  
9 that copies of repeated DNA are maintained as identical sequence by frequent  
10 recombination and gene conversion.

11

12 The long repeat of *B. nigra* and *B. carinata* underwent massive change in the lineage  
13 leading to the other four Brassica species. The first 1.6kb and the last 1.7kb of the  
14 repeat of *B. nigra* are conserved in the *B. rapa* group, and the *ccmB* gene still flanks  
15 the repeat on one side. However, the last 1.7kb are inverted and separated from the  
16 first 1.6kb by 3.3kb of a sequence of unknown origin. An additional difference is  
17 seen in *B. oleracea* wherein *rps7* now flanks the repeat rather than *ccmB*. Other  
18 major changes appear to have occurred in the time since *B. nigra* diverged from the  
19 ancestor of *B. oleracea* and *B. rapa*; a comparison of the complete mitochondrial  
20 genomes of *B. rapa* and *B. nigra* reveal at least 13 segments of DNA that have been  
21 rearranged. No major rearrangements have occurred between *B. nigra* and *B.*  
22 *carinata*, nor between *B. rapa*, *B. juncea* and *B. napus polima*. *B. oleracea* differs from  
23 *B. rapa* by approximately six rearrangement events.

1

2 At the same time that the *B. nigra* long repeat was being dramatically altered in the  
3 lineage leading to *B. rapa* and *B. oleracea*, a new long repeat appeared, which  
4 includes the coding sequence of the *cox2* gene. This new long repeat is maintained  
5 throughout this group of four species, and the flanking genes are also conserved  
6 (alignments are shown in Supplemental Figure S2). The *cox2* gene is single copy in  
7 *R. sativus*, *S. arvensis*, *B. nigra* and *B. carinata*, and is in a nearly syntenic  
8 arrangement with neighboring genes.

9

## 10 **Discussion**

11 The availability of complete mitochondrial genome sequences from many taxa of  
12 green plant allows us to compare the repeat structures across taxa. Although Large  
13 Repeats and ROUS have been known for some time, their functions (if any) and  
14 evolution are largely mysterious. It has been suggested that their existence and  
15 maintenance are outgrowths of double-strand break repair events such as  
16 nonhomologous end-joining (NHEJ), break-induced replication (BIR) and gene  
17 conversion (Christensen, A. C. 2018). We describe here a Python script that uses  
18 BLAST (Altschul, S. F. *et al.* 1990) to find non-tandem repeats within genomes, and  
19 use it to analyze plant mitochondrial DNA. Comparison of repeats between closely  
20 related species showed that repeat differences between species were largely due to  
21 rearrangements and block substitutions or insertions, which could be due to NHEJ  
22 and BIR, while the two copies of the repeat were identical within a species,  
23 suggesting continuing repair by gene conversion or homologous recombination.



1

2 The phylogenetic distribution of complex repeated structures in mitochondria  
3 appear to be common to the vascular plants and significantly different from the  
4 more primitive non-vascular taxa. This suggests that the common ancestor of  
5 lycophytes, ferns and seed plants adopted a new mechanism or strategy of  
6 mitochondrial genome replication and repair that led to a proliferation of repeats  
7 and increases in size. Complete sequences of more species, particularly in the  
8 lycophytes and ferns, is necessary to add clarity but the ancestor of vascular plants  
9 evidently made a transition to increased use of double-strand break repair in their  
10 mitochondria, leading to the genomic gymnastics seen today in plants.

11

12 The analysis of repeats in the *Brassica* species suggests that mitochondrial genomes  
13 can remain relatively static for long periods of time, but can also diverge very  
14 rapidly resembling punctuated equilibrium (Gould, S. J. and N. Eldredge 1977) that  
15 includes major rearrangements, sequence loss, and gain of sequences of unknown  
16 origin. The mechanisms and frequency are unknown, but it suggests that a lineage  
17 can experience a burst of genome recombination, breakage and rejoining,  
18 dramatically rearranging and altering the mitochondrial genome, as if it had been  
19 shattered and rebuilt. These events occur on a time scale that is faster than that of  
20 speciation, leading to the high levels of divergence, and a lack of strong correlations  
21 with the phylogeny.

22

1 Qualitative differences have been described between the repeats shorter and longer  
2 than about 1kb (Arrieta-Montiel, M. P. *et al.* 2009; Klein, M. *et al.* 1994; Mower, J. P.  
3 *et al.* 2012). The clustering within phylogenetic groups (Figure 2) and the trend  
4 towards bimodality (Figure 3) suggest differences between the large repeats and  
5 the smaller ones. We suggest that the term “large repeats” be reserved for those  
6 ROUS that are involved in genome isomerization. A working definition could be  
7 those ROUS larger than 1000bp, but functional analysis may reveal different size  
8 cutoffs in different species. Functional analysis can be done by analyzing clones big  
9 enough to include the repeats (Klein, M. *et al.* 1994), by long read sequencing  
10 (Shearman, J. R. *et al.* 2016) or Southern blotting. Functional analysis of the large  
11 repeats is an important step in understanding genome structure and evolution (Guo,  
12 W. *et al.* 2016; Guo, W. *et al.* 2017; Sloan, D. B. 2013) and may reveal different size  
13 cutoffs between species, which would reveal important differences in the replication  
14 and repair machinery and dynamics.

15

16 We doubt that there is an adaptive advantage to large size and abundant  
17 rearrangements in the genomes of plant mitochondria. We suggest that these are  
18 merely correlated traits accompanying the adaptive advantage of a greatly  
19 increased reliance on double-strand break repair. DNA repair is critically important  
20 because damage is more likely in mitochondria than the nucleus due to the changes  
21 in pH and redox potential, and the presence of reactive oxygen species. The strategy  
22 followed by animals is to minimize mutational targets by reducing genome size  
23 (Lynch, M. *et al.* 2006; Smith, D. R. 2016). However, with multiple copies of

1 mitochondrial DNA in each cell, an alternative trajectory is to increase the use of  
2 template DNA in repair. The template-based accuracy of double-strand break repair  
3 is accompanied by the creation of chimeras, rearrangements and duplications when  
4 templates are not identical or cannot be found by the repair enzymes. Dramatic  
5 expansions, rearrangements and losses, accompanied by low substitution rates in  
6 genes is characteristic of flowering plant mitochondria. Selection on gene function  
7 maintains the genes, while the expansions and rearrangements must be nearly  
8 neutral. Once mitochondria evolved very efficient double-strand break repair, and a  
9 mechanism for inducing double-strand breaks at the sites of many types of damage,  
10 more primitive mechanisms, such as nucleotide excision repair can and have been  
11 lost (Gualberto, J. M. *et al.* 2014; Gualberto, J. M. and K. J. Newton 2017) without  
12 obvious evolutionary cost.

13

14 The adaptive value of increased and efficient double-strand break repair is probably  
15 to avoid mutations in the essential genes of mitochondria, and is possible because of  
16 the abundance of double-stranded template molecules in each cell. However this  
17 mechanism of repair has an additional correlated trait. There are bacterial species,  
18 such as *Deinococcus radiodurans*, that excel at double-strand break repair and can  
19 rebuild even significantly fragmented genomes (Krisiko, A. and M. Radman 2013).  
20 This species is notoriously resistant to ionizing radiation, but the adaptive value of  
21 the trait is thought to be desiccation resistance, because dehydration also produces  
22 double-strand breaks (Mattimore, V. and J. R. Battista 1996). Radiation resistant  
23 bacteria in unrelated phylogenetic groups show more genome rearrangements and

1 loss of synteny than their radiation sensitive relatives (Repar, J. *et al.* 2017),  
2 suggesting that abundant double-strand break repair is the cause of both the  
3 resistance to significant double-strand breakage and the loss of synteny. An  
4 interesting possibility is that very efficient double-strand break repair in plant  
5 mitochondria also confers desiccation resistance as a correlated trait. Because  
6 mitochondria are metabolically active immediately upon imbibition of seeds, DNA  
7 damage must be repaired very efficiently and rapidly (Paszkiwicz, G. *et al.* 2017).  
8 Efficient repair of desiccation-mediated damage in all cellular compartments is a  
9 prerequisite to being able to produce seeds or spores for reproduction. It is possible  
10 that the DNA repair strategy of plant mitochondria was one of several factors  
11 (including desiccation resistance of the nuclear and plastid genomes, presumably by  
12 distinct mechanisms) that are beneficial to vascular plants. The evidence of the  
13 repeats suggests that the transition to double-strand break repair in mitochondria  
14 occurred at approximately the same time as the transition to vascularity in plants,  
15 and it may have been one of several traits that enabled their success. In addition,  
16 once the life cycles of land plants included periods of desiccation in spores and  
17 seeds, double-strand breakage would have increased, accompanied by increases in  
18 rearrangements, expansions, and chimeras. The mechanisms of double-strand break  
19 repair continue to be important for understanding the evolution of plant  
20 mitochondrial genomes.

21

22 **Acknowledgements**

1 We are grateful to Jeff Mower and Brandi Sigmon for many helpful comments on the  
2 manuscript, and Alex Kozik (UC Davis) for beta testing. ACC is grateful to Meric  
3 Lieberman and Isabelle Henry (U.C. Davis) for introducing him to Python scripting.  
4 ELW thanks Maya Khasin for support and encouragement. This work was supported  
5 in part by a grant from the National Science Foundation (MCB-1413152).

6

7

## 1 **Supplemental Materials**

2 Supplemental File S1. Python script ROUSFinder.py

3 Supplemental File S2. Python script MultipleRepeats.py

4 Supplemental Table S1. Repeat sizes of all species used in this study. Bins include  
5 repeats larger than the size in the header, up to the next bin size.

6 Supplemental Figure S1. Alignment of the long repeats from *Raphanus sativus*,  
7 *Sinapis arvensis*, *Brassica nigra* and *Brassica carinata* with the homologous  
8 sequences from *Brassica rapa*, *Brassica juncea*, *Brassica napus polima* and *Brassica*  
9 *oleracea*. Part a is interleaved, and part b is in sequential fasta format.

10 Supplemental Figure S2. Alignment of the long repeats from *Brassica rapa*, *Brassica*  
11 *juncea*, *Brassica napus polima* and *Brassica oleracea*, with the homologous sequences  
12 from *Raphanus sativus*, *Sinapis arvensis*, *Brassica nigra* and *Brassica carinata*. Part a  
13 is interleaved, and part b is in sequential fasta format.

14

1 Figure 1. Size distributions of repeats in groups of species. The number of species  
 2 represented in each group is shown. Headings indicate the bins of repeat sizes and  
 3 the numbers indicate the fraction of species in that group that have at least one  
 4 repeat of that size. Heat map color coding is blue for the highest value and yellow for  
 5 zero.

6

|                  | #sp | 50-199 | 200-499 | 500-999 | 1000-2499 | 2500-4999 | 5000-7499 | 7500-9999 | ≥ 10000 |
|------------------|-----|--------|---------|---------|-----------|-----------|-----------|-----------|---------|
| Chlorophyta      | 26  | 0.88   | 0.19    | 0.08    | 0.00      | 0.00      | 0.00      | 0.00      | 0.00    |
| Prasinophytes    | 8   | 0.63   | 0.00    | 0.00    | 0.00      | 0.00      | 0.00      | 0.50      | 0.25    |
| Anthocerotophyta | 2   | 1.00   | 0.50    | 1.00    | 0.00      | 0.00      | 0.00      | 0.00      | 0.00    |
| Marchantiophyta  | 4   | 1.00   | 1.00    | 0.50    | 0.00      | 0.00      | 0.00      | 0.00      | 0.00    |
| Bryophytes       | 23  | 1.00   | 0.00    | 0.00    | 0.00      | 0.00      | 0.00      | 0.00      | 0.00    |
| Charophyta       | 8   | 0.88   | 0.25    | 0.00    | 0.00      | 0.00      | 0.00      | 0.00      | 0.00    |
| Fern             | 2   | 1.00   | 1.00    | 1.00    | 1.00      | 1.00      | 0.00      | 1.00      | 0.00    |
| Lycophyte        | 2   | 1.00   | 1.00    | 1.00    | 1.00      | 1.00      | 0.00      | 0.50      | 0.00    |
| Gymnosperm       | 3   | 1.00   | 1.00    | 0.33    | 0.67      | 0.33      | 0.33      | 0.00      | 0.00    |
| Angiosperm       | 58  | 1.00   | 0.97    | 0.43    | 0.43      | 0.43      | 0.36      | 0.26      | 0.41    |

7  
8





1 Figure 3. Long repeats in the Brassicales. A phylogenetic tree is shown at left,  
2 derived from Grewe *et al* (Grewe, F. *et al.* 2014). In part A are the regions  
3 surrounding the long repeat in *R. sativus*, *S. arvensis*, *B. nigra* and *B. carinata*. The  
4 homologous sequence from *B. rapa*, *B. napus*, *B. juncea* and *B. oleracea* is also shown.  
5 Part A shows the regions surrounding the long repeat in *B. rapa*, *B. napus*, *B. juncea*  
6 and *B. oleracea*, and the homologous region in the prior four species. Branch lengths  
7 in the tree are not to scale. The sequences are depicted at the scale shown in the  
8 figure.  
9

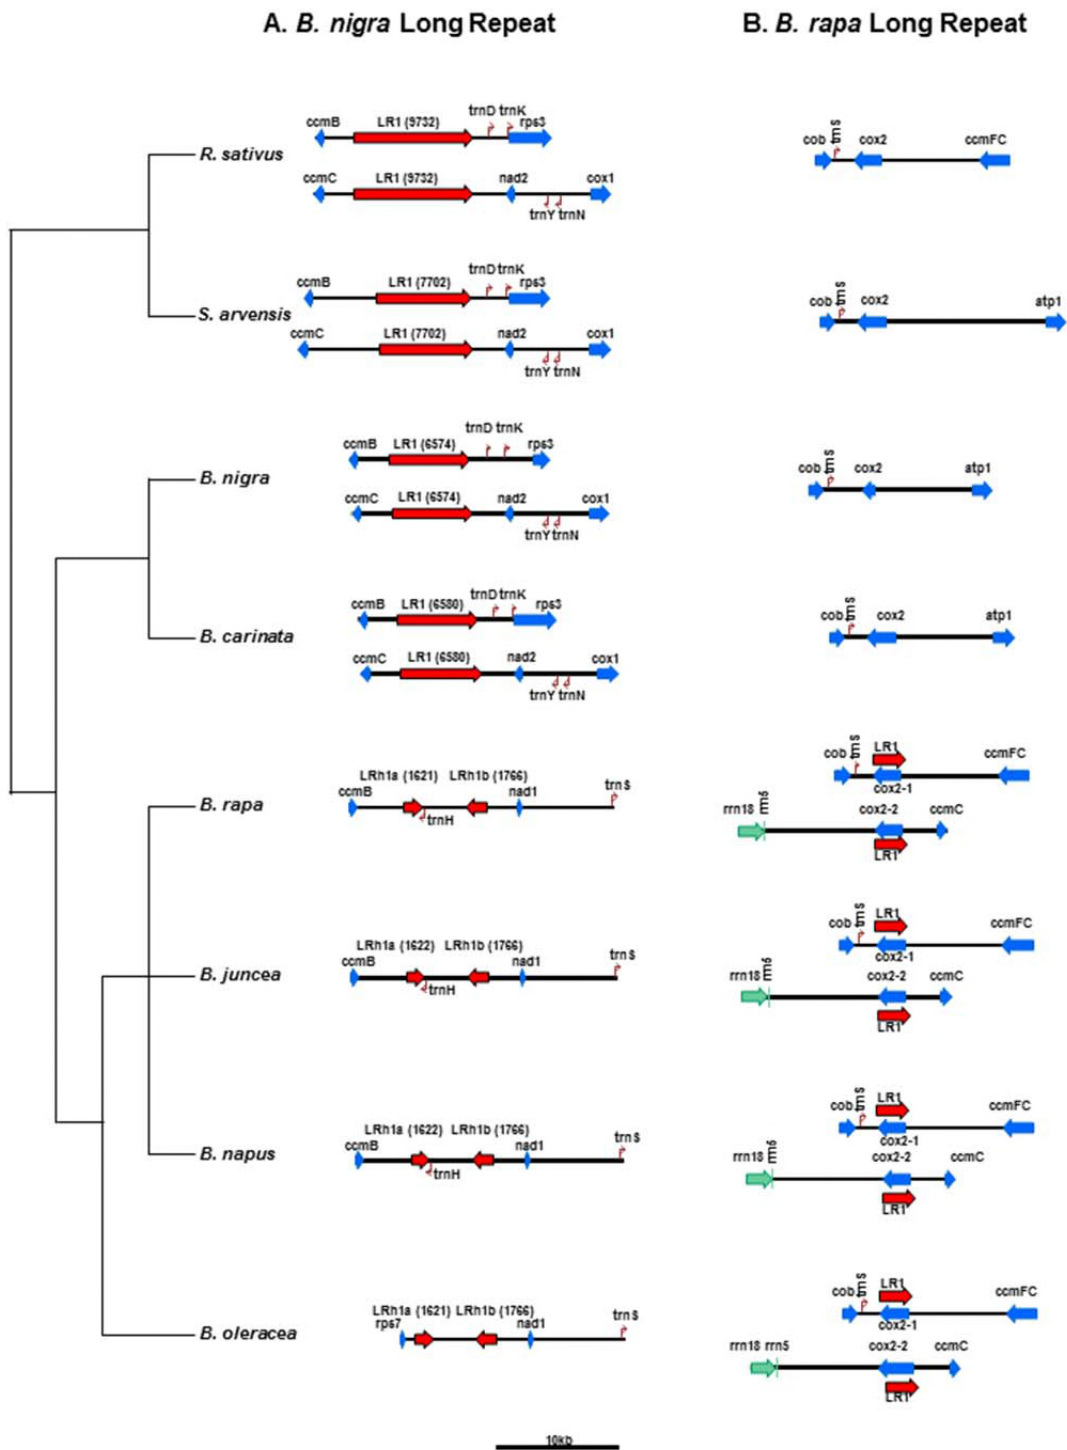

1

2

1 Table 1. List of species and mitochondrial DNA accession numbers

| Genus species                         | Group            | Subgroup             | Accession Number |
|---------------------------------------|------------------|----------------------|------------------|
| <i>Auxenochlorella protothecoides</i> | Chlorophytes     | Chlorophyta          | KC843974.1       |
| <i>Botryococcus braunii</i>           | Chlorophytes     | Chlorophyta          | LT545992.1       |
| <i>Bracteacoccus aerius</i>           | Chlorophytes     | Chlorophyta          | KJ806265.1       |
| <i>Chlamydomonas eustigma</i>         | Chlorophytes     | Chlorophyta          | BEGY01000520.1   |
| <i>Chlamydomonas reinhardtii</i>      | Chlorophytes     | Chlorophyta          | EU306617.1       |
| <i>Chlorella</i> sp. ArM0029B         | Chlorophytes     | Chlorophyta          | KF554428.1       |
| <i>Dunaliella salina</i> strain GN    | Chlorophytes     | Chlorophyta          | KX641169.1       |
| <i>Eudorina</i> sp.                   | Chlorophytes     | Chlorophyta          | KY442294.1       |
| <i>Gloeotilopsis planctonica</i>      | Chlorophytes     | Chlorophyta          | KX306823.1       |
| <i>Gloeotilopsis sarcinoidea</i>      | Chlorophytes     | Chlorophyta          | KX306822.1       |
| <i>Hariotina</i> sp. MMOGRB0030F      | Chlorophytes     | Chlorophyta          | KU145405.1       |
| <i>Kirchneriella aperta</i>           | Chlorophytes     | Chlorophyta          | NC_024759.1      |
| <i>Lobosphaera incisa</i>             | Chlorophytes     | Chlorophyta          | KP902678.1       |
| <i>Microspora stagnorum</i>           | Chlorophytes     | Chlorophyta          | KF060942.1       |
| <i>Mychonastes homosphaera</i>        | Chlorophytes     | Chlorophyta          | NC_024760.1      |
| <i>Neochloris aquatica</i>            | Chlorophytes     | Chlorophyta          | NC_024761.1      |
| <i>Oltmannsiellopsis viridis</i>      | Chlorophytes     | Chlorophyta          | DQ365900.1       |
| <i>Ostreococcus tauri</i>             | Chlorophytes     | Prasinophytes        | CR954200.2       |
| <i>Ourococcus multispurus</i>         | Chlorophytes     | Chlorophyta          | NC_024762.1      |
| <i>Polytoma uvella</i>                | Chlorophytes     | Chlorophyta          | NC_026572.1      |
| <i>Prototheca wickerhamii</i>         | Chlorophytes     | Chlorophyta          | U02970.1         |
| <i>Pseudendoclonium akinetum</i>      | Chlorophytes     | Chlorophyta          | AY359242.1       |
| <i>Tetrademus obliquus</i>            | Chlorophytes     | Chlorophyta          | CM007918.1       |
| <i>Trebouxiophyceae</i> sp. MX-AZ01   | Chlorophytes     | Chlorophyta          | JX315601.1       |
| <i>Ulva flexuosa</i>                  | Chlorophytes     | Chlorophyta          | KX455878.1       |
| <i>Ulva linza</i>                     | Chlorophytes     | Chlorophyta          | NC_029701.1      |
| <i>Nephroselmis olivacea</i>          | Chlorophytes     | Nephroselmidophyceae | AF110138.1       |
| <i>Bathycoccus prasinus</i>           | Chlorophytes     | Prasinophytes        | NC_023273.1      |
| <i>Cymbomonas tetramitiiformis</i>    | Chlorophytes     | Prasinophytes        | KX013548.1       |
| <i>Micromonas</i> sp. RCC299          | Chlorophytes     | Prasinophytes        | FJ859351.1       |
| <i>Monomastix</i> sp. OKE-1           | Chlorophytes     | Prasinophytes        | KF060939.1       |
| <i>Prasinoderma coloniale</i>         | Chlorophytes     | Prasinophytes        | KF387569.1       |
| <i>Pyrenococcus provasolii</i>        | Chlorophytes     | Prasinophytes        | GQ497137.1       |
| <i>Pyramimonas parkeae</i>            | Chlorophytes     | Prasinophytes        | KX013547.1       |
| <i>Megaceros aenigmaticus</i>         | Anthocerotophyta | Anthocerotophyta     | EU660574.1       |
| <i>Phaeoceros laevis</i>              | Anthocerotophyta | Anthocerotophyta     | GQ376531.1       |
| <i>Aneura pinguis</i>                 | Marchantiophyta  | Marchantiophyta      | KP728938.1       |
| <i>Marchantia polymorpha</i>          | Marchantiophyta  | Marchantiophyta      | NC_001660.1      |
| <i>Pleurozia purpurea</i>             | Marchantiophyta  | Marchantiophyta      | NC_013444.1      |
| <i>Treubia lacunosa</i>               | Marchantiophyta  | Marchantiophyta      | JF973315.1       |
| <i>Anomodon attenuatus</i>            | Bryophytes       | Bryophytes           | JX402749.1       |
| <i>Atrichum angustatum</i>            | Bryophytes       | Bryophytes           | KC784956.1       |
| <i>Bartramia pomiformis</i>           | Bryophytes       | Bryophytes           | KC784955.1       |
| <i>Brachythecium rivulare</i>         | Bryophytes       | Bryophytes           | KR732319.1       |
| <i>Bucklandiella orthotrichacea</i>   | Bryophytes       | Bryophytes           | KP742835.1       |
| <i>Buxbaumia aphylla</i>              | Bryophytes       | Bryophytes           | KC784954.1       |
| <i>Climacium americanum</i>           | Bryophytes       | Bryophytes           | KC784950.1       |
| <i>Codriophorus aciculare</i>         | Bryophytes       | Bryophytes           | KP453983.1       |
| <i>Funaria hygrometrica</i>           | Bryophytes       | Bryophytes           | KC784959.1       |
| <i>Hypnum imponens</i>                | Bryophytes       | Bryophytes           | KC784951.1       |
| <i>Nyholmiella gymnostoma</i>         | Bryophytes       | Bryophytes           | KX578030.1       |
| <i>Orthotrichum callistomum</i>       | Bryophytes       | Bryophytes           | KX578029.1       |
| <i>Oxystegus tenuirostris</i>         | Bryophytes       | Bryophytes           | KT326816.1       |
| <i>Physcomitrella patens</i>          | Bryophytes       | Bryophytes           | NC_007945.1      |
| <i>Ptychomnion cygnisetum</i>         | Bryophytes       | Bryophytes           | KC784949.1       |
| <i>Sanionia uncinata</i>              | Bryophytes       | Bryophytes           | KP984757.1       |

|                                     |              |            |             |
|-------------------------------------|--------------|------------|-------------|
| <i>Sphagnum palustre</i>            | Bryophytes   | Bryophytes | KC784957.1  |
| <i>Stoneobryum bunyaense</i>        | Bryophytes   | Bryophytes | KX578031.1  |
| <i>Syntrichia filaris</i>           | Bryophytes   | Bryophytes | KP984758.1  |
| <i>Tetraphis pellucida</i>          | Bryophytes   | Bryophytes | KC784953.1  |
| <i>Tetraplodon fuegianus</i>        | Bryophytes   | Bryophytes | KT373818.1  |
| <i>Ulota phyllantha</i>             | Bryophytes   | Bryophytes | KX578033.1  |
| <i>Zygodon viridissimus</i>         | Bryophytes   | Bryophytes | KX711975.1  |
| <i>Chaetosphaeridium globosum</i>   | Streptophyta | Charophyta | AF494279.1  |
| <i>Chara vulgaris</i>               | Streptophyta | Charophyta | AY267353.1  |
| <i>Chlorokybus atmophyticus</i>     | Streptophyta | Charophyta | NC_009630.1 |
| <i>Closterium baillyanum</i>        | Streptophyta | Charophyta | NC_022860.1 |
| <i>Entransia fimbriata</i>          | Streptophyta | Charophyta | KF060941.1  |
| <i>Klebsormidium flaccidum</i>      | Streptophyta | Charophyta | KP165386.1  |
| <i>Nitella hyalina</i>              | Streptophyta | Charophyta | JF810595.1  |
| <i>Roya obtusa</i>                  | Streptophyta | Charophyta | KF060943.1  |
| <i>Ophioglossum californicum</i>    | Tracheophyta | Fern       | NC_030900.1 |
| <i>Psilotum nudum</i>               | Tracheophyta | Fern       | NC_030952.1 |
| <i>Huperzia squarrosa</i>           | Tracheophyta | Lycophyte  | NC_017755.1 |
| <i>Selaginella moellendorffii</i>   | Tracheophyta | Lycophyte  | GL377739.1  |
| <i>Ginkgo biloba</i>                | Tracheophyta | Gymnosperm | KM672373.1  |
| <i>Welwitschia mirabilis</i>        | Tracheophyta | Gymnosperm | NC_029130.1 |
| <i>Cycas taitugensis</i>            | Tracheophyta | Gymnosperm | AP009381.1  |
| <i>Aegilops speltoides</i>          | Tracheophyta | Angiosperm | AP013107.1  |
| <i>Ajuga reptans</i>                | Tracheophyta | Angiosperm | KF709392.1  |
| <i>Allium cepa</i>                  | Tracheophyta | Angiosperm | KU318712.1  |
| <i>Arabidopsis thaliana</i>         | Tracheophyta | Angiosperm | BK010421    |
| <i>Batis maritima</i>               | Tracheophyta | Angiosperm | KJ820684.1  |
| <i>Beta vulgaris</i>                | Tracheophyta | Angiosperm | BA000024.1  |
| <i>Betula pendula</i>               | Tracheophyta | Angiosperm | LT855379.1  |
| <i>Boea hygrometrica</i>            | Tracheophyta | Angiosperm | JN107812.1  |
| <i>Brassica nigra</i>               | Tracheophyta | Angiosperm | KP030753.1  |
| <i>Butomus umbellatus</i>           | Tracheophyta | Angiosperm | KC208619.1  |
| <i>Cannabis sativa</i>              | Tracheophyta | Angiosperm | KU310670.1  |
| <i>Capsicum annuum</i>              | Tracheophyta | Angiosperm | KJ865410.1  |
| <i>Carica papaya</i>                | Tracheophyta | Angiosperm | EU431224.1  |
| <i>Castilleja paramensis</i>        | Tracheophyta | Angiosperm | KT959112.1  |
| <i>Citrullus lanatus</i>            | Tracheophyta | Angiosperm | GQ856147.1  |
| <i>Cocos nucifera</i>               | Tracheophyta | Angiosperm | KX028885.1  |
| <i>Corchorus capsularis</i>         | Tracheophyta | Angiosperm | KT894204.1  |
| <i>Daucus carota subsp. sativus</i> | Tracheophyta | Angiosperm | JQ248574.1  |
| <i>Diplostegium hartwegii</i>       | Tracheophyta | Angiosperm | KX063855.1  |
| <i>Eruca vesicaria</i>              | Tracheophyta | Angiosperm | KF442616.1  |
| <i>Geranium maderense</i>           | Tracheophyta | Angiosperm | NC_027000.1 |
| <i>Glycine max</i>                  | Tracheophyta | Angiosperm | JX463295.1  |
| <i>Gossypium hirsutum</i>           | Tracheophyta | Angiosperm | NC_027406.1 |
| <i>Helianthus annuus</i>            | Tracheophyta | Angiosperm | CM007908.1  |
| <i>Heuchera parviflora</i>          | Tracheophyta | Angiosperm | KR559021.1  |
| <i>Hibiscus cannabinus</i>          | Tracheophyta | Angiosperm | MF163174.1  |
| <i>Hordeum vulgare</i>              | Tracheophyta | Angiosperm | AP017300.1  |
| <i>Hyoscyamus niger</i>             | Tracheophyta | Angiosperm | KM207685.1  |
| <i>Ipomoea nil</i>                  | Tracheophyta | Angiosperm | AP017303.1  |
| <i>Lagerstroemia indica</i>         | Tracheophyta | Angiosperm | KX641464.1  |
| <i>Liriodendron tulipifera</i>      | Tracheophyta | Angiosperm | NC_021152.1 |
| <i>Lolium perenne</i>               | Tracheophyta | Angiosperm | JX999996.1  |
| <i>Lotus japonicus</i>              | Tracheophyta | Angiosperm | JN872551.2  |
| <i>Medicago truncatula</i>          | Tracheophyta | Angiosperm | KT971339.1  |
| <i>Milletia pinnata</i>             | Tracheophyta | Angiosperm | JN872550.1  |
| <i>Mimulus guttatus</i>             | Tracheophyta | Angiosperm | JN098455.1  |
| <i>Nicotiana tabacum</i>            | Tracheophyta | Angiosperm | BA000042.1  |

|                                |              |            |             |
|--------------------------------|--------------|------------|-------------|
| <i>Oryza sativa Indica</i>     | Tracheophyta | Angiosperm | NC_007886.1 |
| <i>Phoenix dactylifera</i>     | Tracheophyta | Angiosperm | JN375330.1  |
| <i>Populus tremula</i>         | Tracheophyta | Angiosperm | KT337313.1  |
| <i>Raphanus sativus</i>        | Tracheophyta | Angiosperm | NC_018551.1 |
| <i>Rhazya stricta</i>          | Tracheophyta | Angiosperm | KJ485850.1  |
| <i>Ricinus communis</i>        | Tracheophyta | Angiosperm | HQ874649.1  |
| <i>Salix suchowensis</i>       | Tracheophyta | Angiosperm | KU056812.1  |
| <i>Salvia miltiorrhiza</i>     | Tracheophyta | Angiosperm | KF177345.1  |
| <i>Schrenkiella parvula</i>    | Tracheophyta | Angiosperm | KT988071.2  |
| <i>Silene latifolia</i>        | Tracheophyta | Angiosperm | HM562727.1  |
| <i>Sinapis arvensis</i>        | Tracheophyta | Angiosperm | KM851044.1  |
| <i>Sorghum bicolor</i>         | Tracheophyta | Angiosperm | DQ984518.1  |
| <i>Spinacia oleracea</i>       | Tracheophyta | Angiosperm | KY768855.1  |
| <i>Tripsacum dactyloides</i>   | Tracheophyta | Angiosperm | NC_008362.1 |
| <i>Triticum aestivum</i>       | Tracheophyta | Angiosperm | AP008982.1  |
| <i>Vicia faba</i>              | Tracheophyta | Angiosperm | KC189947.1  |
| <i>Vigna angularis</i>         | Tracheophyta | Angiosperm | AP012599.1  |
| <i>Viscum album</i>            | Tracheophyta | Angiosperm | NC_029039.1 |
| <i>Vitis vinifera complete</i> | Tracheophyta | Angiosperm | FM179380.1  |
| <i>Zea mays strain NB</i>      | Tracheophyta | Angiosperm | AY506529.1  |
| <i>Ziziphus jujuba</i>         | Tracheophyta | Angiosperm | KU187967.1  |

1  
2

## 1 **Literature Cited**

- 2 Abdelnoor, R. V., R. Yule, A. Elo, A. C. Christensen, G. Meyer-Gauen *et al.*, 2003  
3 Substoichiometric shifting in the plant mitochondrial genome is influenced  
4 by a gene homologous to *MutS*. Proc. Natl. Acad. Sci. U S A 100: 5968-5973.
- 5 Altschul, S. F., W. Gish, W. Miller, E. W. Myers and D. J. Lipman, 1990 Basic local  
6 alignment search tool. J Mol Biol 215: 403-410.
- 7 Alverson, A. J., D. W. Rice, S. Dickinson, K. Barry and J. D. Palmer, 2011a Origins and  
8 recombination of the bacterial-sized multichromosomal mitochondrial  
9 genome of cucumber. Plant Cell 23: 2499-2513.
- 10 Alverson, A. J., X. Wei, D. W. Rice, D. B. Stern, K. Barry *et al.*, 2010 Insights into the  
11 evolution of mitochondrial genome size from complete sequences of *Citrullus*  
12 *lanatus* and *Cucurbita pepo* (Cucurbitaceae). Mol Biol Evol 27: 1436-1448.
- 13 Alverson, A. J., S. Zhuo, D. W. Rice, D. B. Sloan and J. D. Palmer, 2011b The  
14 mitochondrial genome of the legume *Vigna radiata* and the analysis of  
15 recombination across short mitochondrial repeats. PLoS One 6: e16404.
- 16 Arrieta-Montiel, M. P., V. Shedge, J. Davila, A. C. Christensen and S. A. Mackenzie,  
17 2009 Diversity of the Arabidopsis Mitochondrial Genome Occurs via Nuclear-  
18 Controlled Recombination Activity. Genetics 183: 1261-1268.
- 19 Bendich, A. J., 2004 Circular Chloroplast Chromosomes: The Grand Illusion. The  
20 Plant Cell 16: 1661-1666.
- 21 Chang, S., T. Yang, T. Du, Y. Huang, J. Chen *et al.*, 2011 Mitochondrial genome  
22 sequencing helps show the evolutionary mechanism of mitochondrial  
23 genome formation in Brassica. BMC Genomics 12: 497.

- 1 Chaw, S. M., A. C. Shih, D. Wang, Y. W. Wu, S. M. Liu *et al.*, 2008 The mitochondrial  
2 genome of the gymnosperm *Cycas taitungensis* contains a novel family of  
3 short interspersed elements, Bpu sequences, and abundant RNA editing sites.  
4 *Mol Biol Evol* 25: 603-615.
- 5 Cheng, F., J. Liang, C. Cai, X. Cai, J. Wu *et al.*, 2017 Genome sequencing supports a  
6 multi-vertex model for Brassiceae species. *Curr Opin Plant Biol* 36: 79-87.
- 7 Christensen, A. C., 2014 Genes and Junk in Plant Mitochondria—Repair Mechanisms  
8 and Selection. *Genome Biol Evol* 6: 1448-1453.
- 9 Christensen, A. C., 2018 Mitochondrial DNA Repair and Genome Evolution, pp. 11-31  
10 in *Annual Plant Reviews, 2nd Edition, Plant Mitochondria*, edited by D. C.  
11 Logan. Wiley-Blackwell, New York, NY, USA.
- 12 Davila, J. I., M. P. Arrieta-Montiel, Y. Wamboldt, J. Cao, J. Hagemann *et al.*, 2011  
13 Double-strand break repair processes drive evolution of the mitochondrial  
14 genome in *Arabidopsis*. *BMC Biol* 9: 64.
- 15 Drouin, G., H. Daoud and J. Xia, 2008 Relative rates of synonymous substitutions in  
16 the mitochondrial, chloroplast and nuclear genomes of seed plants. *Mol*  
17 *Phylogenet Evol* 49: 827-831.
- 18 Folkerts, O., and M. R. Hanson, 1989 Three copies of a single recombination repeat  
19 occur on the 443 kb master circle of the *Petunia hybrida* 3704 mitochondrial  
20 genome. *Nucleic Acids Res* 17: 7345-7357.
- 21 Forner, J., B. Weber, C. Wietholter, R. C. Meyer and S. Binder, 2005 Distant sequences  
22 determine 5' end formation of *cox3* transcripts in *Arabidopsis thaliana*  
23 ecotype C24. *Nucleic Acids Res.* 33: 4673-4682.

- 1 Franzke, A., M. A. Lysak, I. A. Al-Shehbaz, M. A. Koch and K. Mummenhoff, 2011  
2 Cabbage family affairs: the evolutionary history of Brassicaceae. *Trends Plant*  
3 *Sci* 16: 108-116.
- 4 Gould, S. J., and N. Eldredge, 1977 Punctuated Equilibria: The Tempo and Mode of  
5 Evolution Reconsidered. *Paleobiology* 3: 115-151.
- 6 Grewe, F., P. P. Edger, I. Keren, L. Sultan, J. C. Pires *et al.*, 2014 Comparative analysis  
7 of 11 Brassicales mitochondrial genomes and the mitochondrial  
8 transcriptome of *Brassica oleracea*. *Mitochondrion*.
- 9 Grewe, F., P. Viehoveer, B. Weisshaar and V. Knoop, 2009 A trans-splicing group I  
10 intron and tRNA-hyperediting in the mitochondrial genome of the lycophyte  
11 *Isoetes engelmannii*. *Nucleic Acids Res* 37: 5093-5104.
- 12 Gualberto, J. M., D. Mileshina, C. Wallet, A. K. Niazi, F. Weber-Lotfi *et al.*, 2014 The  
13 plant mitochondrial genome: dynamics and maintenance. *Biochimie* 100:  
14 107-120.
- 15 Gualberto, J. M., and K. J. Newton, 2017 Plant Mitochondrial Genomes: Dynamics and  
16 Mechanisms of Mutation. *Annu Rev Plant Biol*.
- 17 Guo, W., F. Grewe, W. Fan, G. J. Young, V. Knoop *et al.*, 2016 Ginkgo and *Welwitschia*  
18 Mitogenomes Reveal Extreme Contrasts in Gymnosperm Mitochondrial  
19 Evolution. *Mol Biol Evol* 33: 1448-1460.
- 20 Guo, W., A. Zhu, W. Fan and J. P. Mower, 2017 Complete mitochondrial genomes  
21 from the ferns *Ophioglossum californicum* and *Psilotum nudum* are highly  
22 repetitive with the largest organellar introns. *New Phytol* 213: 391-403.



- 1 Hecht, J., F. Grewe and V. Knoop, 2011 Extreme RNA editing in coding islands and  
2 abundant microsatellites in repeat sequences of *Selaginella moellendorffii*  
3 mitochondria: the root of frequent plant mtDNA recombination in early  
4 tracheophytes. *Genome Biol Evol* 3: 344-358.
- 5 Klein, M., U. Eckert-Ossenkopp, I. Schmiedeberg, P. Brandt, M. Unseld *et al.*, 1994  
6 Physical mapping of the mitochondrial genome of *Arabidopsis thaliana* by  
7 cosmid and YAC clones. *Plant J.* 6: 447-455.
- 8 Krisko, A., and M. Radman, 2013 Biology of extreme radiation resistance: the way of  
9 *Deinococcus radiodurans*. *Cold Spring Harb Perspect Biol* 5: a012765.
- 10 Kurtz, S., and C. Schleiermacher, 1999 REPuter: fast computation of maximal repeats  
11 in complete genomes. *Bioinformatics* 15: 426-427.
- 12 Liu, Y., R. Medina and B. Goffinet, 2014 350 my of mitochondrial genome stasis in  
13 mosses, an early land plant lineage. *Mol Biol Evol* 31: 2586-2591.
- 14 Lynch, M., B. Koskella and S. Schaack, 2006 Mutation Pressure and the Evolution of  
15 Organelle Genomic Architecture. *Science* 311: 1727-1730.
- 16 Mattimore, V., and J. R. Battista, 1996 Radioresistance of *Deinococcus radiodurans*:  
17 functions necessary to survive ionizing radiation are also necessary to  
18 survive prolonged desiccation. *J Bacteriol* 178: 633-637.
- 19 Miller-Messmer, M., K. Kuhn, M. Bichara, M. Le Ret, P. Imbault *et al.*, 2012 RecA-  
20 dependent DNA repair results in increased heteroplasmy of the *Arabidopsis*  
21 mitochondrial genome. *Plant Physiol* 159: 211-226.
- 22 Mower, J. P., A. L. Case, E. R. Floro and J. H. Willis, 2012 Evidence against  
23 equimolarity of large repeat arrangements and a predominant master circle

- 1 structure of the mitochondrial genome from a monkeyflower (*Mimulus*  
2 *guttatus*) lineage with cryptic CMS. *Genome Biol Evol* 4: 670-686.
- 3 Palmer, J. D., 1988 Intraspecific variation and multicircularity in *Brassica*  
4 mitochondrial DNAs. *Genetics* 118: 341-351.
- 5 Palmer, J. D., and L. A. Herbon, 1986 Tricircular mitochondrial genomes of *Brassica*  
6 and *Raphanus*: reversal of repeat configurations by inversion. *Nucleic Acids*  
7 *Res* 14: 9755-9764.
- 8 Palmer, J. D., and L. A. Herbon, 1988 Plant mitochondrial DNA evolves rapidly in  
9 structure, but slowly in sequence. *J Mol Evol* 28: 87-97.
- 10 Palmer, J. D., and C. R. Shields, 1984 Tripartite structure of the *Brassica campestris*  
11 mitochondrial genome. *Nature* 307: 437.
- 12 Park, S., F. Grewe, A. Zhu, T. A. Ruhlman, J. Sabir *et al.*, 2015 Dynamic evolution of  
13 *Geranium* mitochondrial genomes through multiple horizontal and  
14 intracellular gene transfers. *New Phytol* 208: 570-583.
- 15 Parkinson, C. L., J. P. Mower, Y. L. Qiu, A. J. Shirk, K. Song *et al.*, 2005 Multiple major  
16 increases and decreases in mitochondrial substitution rates in the plant  
17 family Geraniaceae. *BMC Evol Biol* 5: 73.
- 18 Paszkiewicz, G., J. M. Gualberto, A. Benamar, D. Macherel and D. C. Logan, 2017  
19 *Arabidopsis* Seed Mitochondria Are Bioenergetically Active Immediately  
20 upon Imbibition and Specialize via Biogenesis in Preparation for Autotrophic  
21 Growth. *Plant Cell* 29: 109-128.

- 1   Repar, J., F. Supek, T. Klanjscek, T. Warnecke, K. Zahradka *et al.*, 2017 Elevated Rate  
2           of Genome Rearrangements in Radiation-Resistant Bacteria. *Genetics* 205:  
3           1677-1689.
- 4   Richardson, A. O., D. W. Rice, G. J. Young, A. J. Alverson and J. D. Palmer, 2013 The  
5           "fossilized" mitochondrial genome of *Liriodendron tulipifera*: ancestral gene  
6           content and order, ancestral editing sites, and extraordinarily low mutation  
7           rate. *BMC Biol* 11: 29.
- 8   Schuster, W., and A. Brennicke, 1994 The Plant Mitochondrial Genome: Physical  
9           Structure, Information Content, RNA Editing, and Gene Migration to the  
10          Nucleus. *Annual Review of Plant Physiology and Plant Molecular Biology* 45:  
11          61-78.
- 12   Shearman, J. R., C. Sonthirod, C. Naktang, W. Pootakham, T. Yoocha *et al.*, 2016 The  
13          two chromosomes of the mitochondrial genome of a sugarcane cultivar:  
14          assembly and recombination analysis using long PacBio reads. *Sci Rep* 6:  
15          31533.
- 16   Shedge, V., M. Arrieta-Montiel, A. C. Christensen and S. A. Mackenzie, 2007 Plant  
17          mitochondrial recombination surveillance requires unusual RecA and MutS  
18          homologs. *Plant Cell* 19: 1251-1264.
- 19   Siculella, L., F. Damiano, M. R. Cortese, E. Dassisti, G. Rainaldi *et al.*, 2001 Gene  
20          content and organization of the oat mitochondrial genome. *Theoretical and*  
21          *Applied Genetics* 103: 359-365.

- 1 Sloan, D. B., 2013 One ring to rule them all? Genome sequencing provides new  
2 insights into the 'master circle' model of plant mitochondrial DNA structure.  
3 *New Phytol* 200: 978-985.
- 4 Sloan, D. B., A. J. Alverson, J. P. Chuckalovcak, M. Wu, D. E. McCauley *et al.*, 2012  
5 Rapid evolution of enormous, multichromosomal genomes in flowering plant  
6 mitochondria with exceptionally high mutation rates. *PLoS Biol* 10:  
7 e1001241.
- 8 Sloan, D. B., A. J. Alverson, H. Storchova, J. D. Palmer and D. R. Taylor, 2010 Extensive  
9 loss of translational genes in the structurally dynamic mitochondrial genome  
10 of the angiosperm *Silene latifolia*. *BMC Evol Biol* 10: 274.
- 11 Sloan, D. B., Z. Wu and J. Sharbrough, 2018 Correction of Persistent Errors in  
12 *Arabidopsis* Reference Mitochondrial Genomes. *The Plant Cell* 30: 525-527.
- 13 Smith, D. R., 2016 The mutational hazard hypothesis of organelle genome evolution:  
14 10 years on. *Mol Ecol* 25: 3769-3775.
- 15 Smith, D. R., R. W. Lee, J. C. Cushman, J. K. Magnuson, D. Tran *et al.*, 2010 The  
16 *Dunaliella salina* organelle genomes: large sequences, inflated with intronic  
17 and intergenic DNA. *BMC Plant Biol* 10: 83.
- 18 Stern, D. B., and J. D. Palmer, 1986 Tripartite mitochondrial genome of spinach:  
19 physical structure, mitochondrial gene mapping, and locations of transposed  
20 chloroplast DNA sequences. *Nucleic Acids Res* 14: 5651-5666.
- 21 Wallet, C., M. Le Ret, M. Bergdoll, M. Bichara, A. Dietrich *et al.*, 2015 The RECG1 DNA  
22 Translocase Is a Key Factor in Recombination Surveillance, Repair, and

1 Segregation of the Mitochondrial DNA in Arabidopsis. Plant Cell 27: 2907-  
2 2925.

3 Ward, B. L., R. S. Anderson and A. J. Bendich, 1981 The mitochondrial genome is  
4 large and variable in a family of plants (cucurbitaceae). Cell 25: 793-803.

5 Wolfe, K., W. Li and P. Sharp, 1987 Rates of nucleotide substitution vary greatly  
6 among plant mitochondrial, chloroplast and nuclear DNAs. Proc. Natl. Acad.  
7 Sci. U S A 84: 9054-9058.

8

9
